# Supplementary material for: Microsatellite Instability, Epstein–Barr Virus, and Programmed Cell Death Ligand 1 as Predictive Markers for Immunotherapy in Gastric Cancer
Source: MDPI journal article supplement (doi:10.3390/cancers14010218), 2022-01-03
Supplement: s1 [file s1]

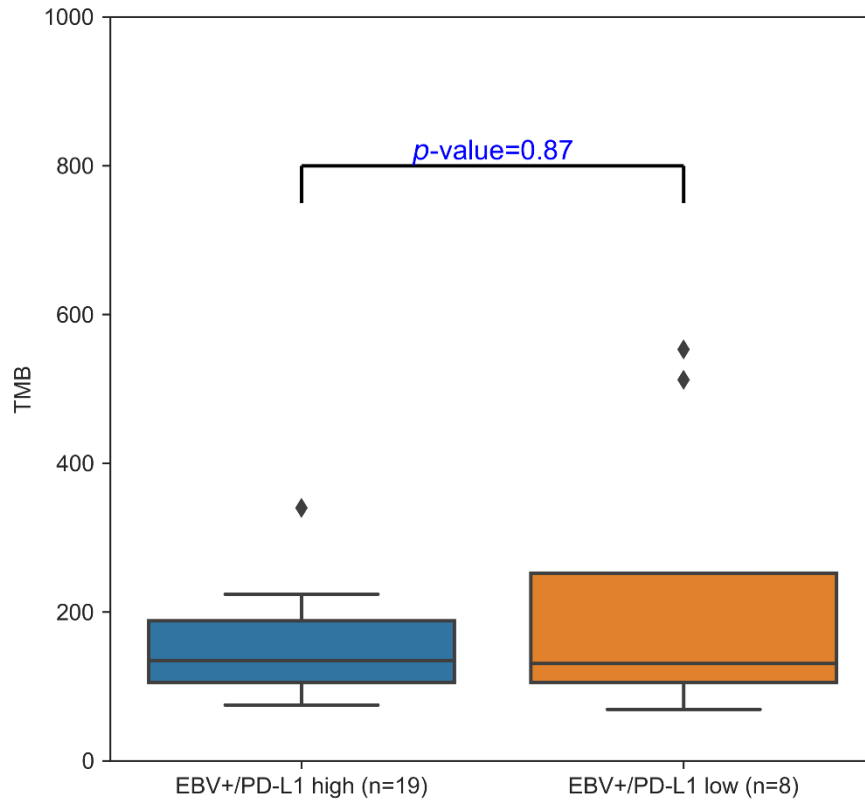

**Figure S1.** Tumor mutation burden between EBV positive and PD-L1 high group versus EBV positive and PD-L1 low group. EBV: Epstein-Barr virus, PD-L1: Programmed death-ligand 1, TMB: tumor mutation burden.

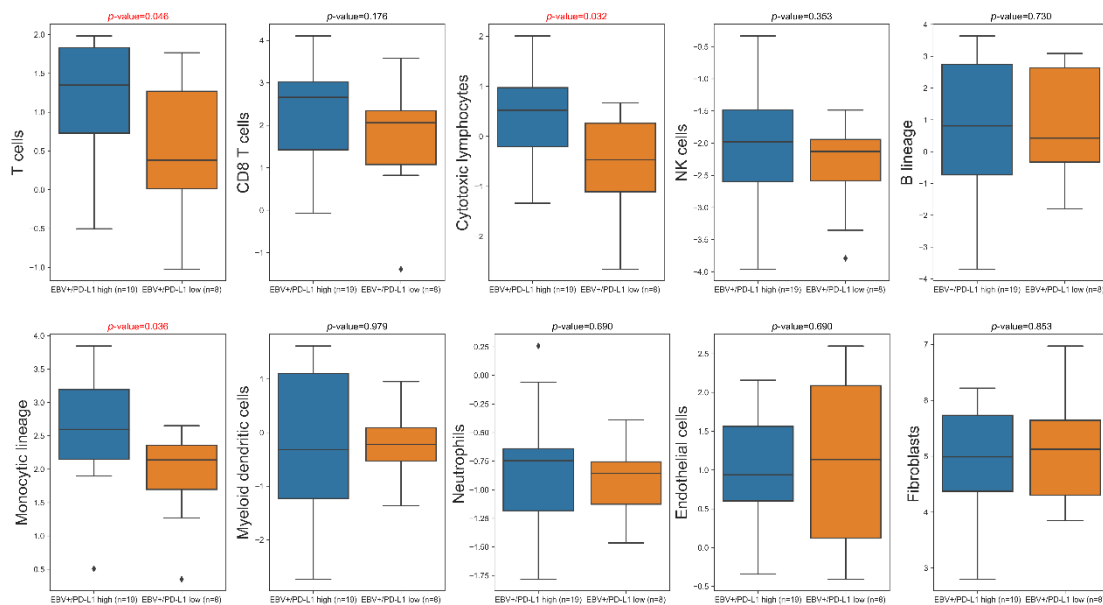

**Figure S2.** Tumor infiltrating lymphocytes in EBV positive and PD-L1 high versus PD-L1 low groups.
